# Supplementary material for: The inhibitory effect of Manuka honey on human colon cancer HCT-116 and LoVo cell growth. Part 1: the suppression of cell proliferation, promotion of apoptosis and arrest of the cell cycle
Source: Royal Society of Chemistry journal article supplement (doi:10.1039/c8fo00164b), 2018-01-01
Supplement: c8fo00164b1.pdf [file c8fo00164b1.pdf]

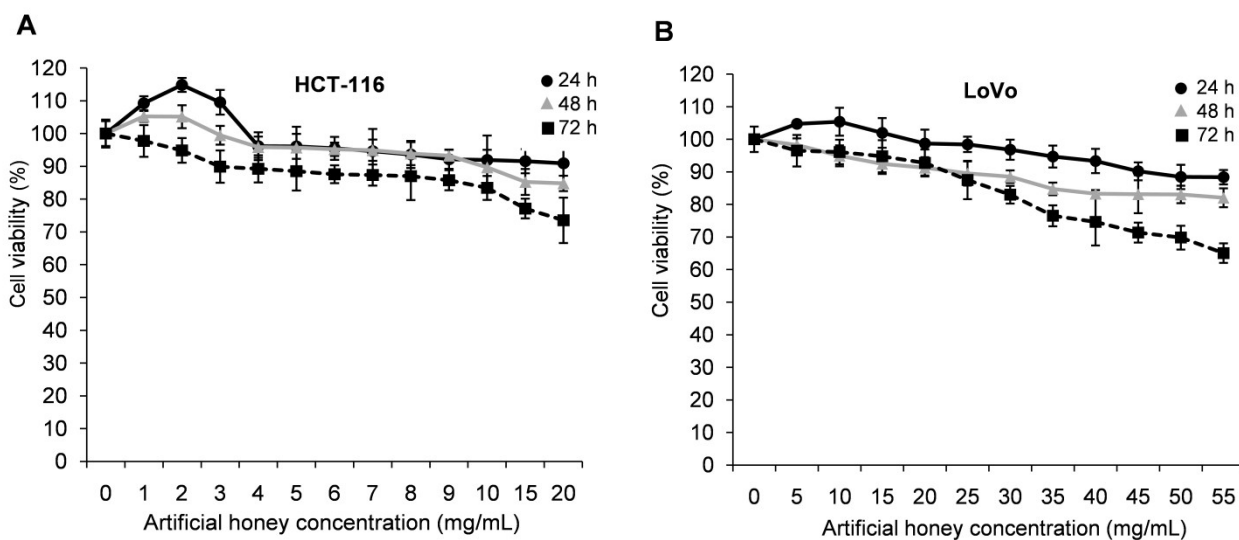

**Supplementary Fig. 1** Inhibition of cell proliferation by artificial honey in (A) HCT-116 and (B) LoVo cell lines. Cells were treated with different concentrations of honey for 24, 48 and 72 h. Cell viability was measured by using MTT assay and results were expressed as a % of viable cells compared to untreated cells. All data are expressed as the mean  $\pm$  standard deviation (SD) (n=3).
