# Supplementary material for: The inhibitory effect of Manuka honey on human colon cancer HCT-116 and LoVo cell growth. Part 1: the suppression of cell proliferation, promotion of apoptosis and arrest of the cell cycle
Source: Royal Society of Chemistry journal article supplement (doi:10.1039/c8fo00164b), 2018-01-01
Supplement: c8fo00164b2.pdf [file c8fo00164b2.pdf]

Supplementary Table 1. Sequences of real-time PCR oligonucleotide primers.

| Gene                     | Direction | Sequence (5'-3')          |
|--------------------------|-----------|---------------------------|
| Cyclin D1                | Forward   | GAACAAACAGATCATCCGCAA     |
|                          | Reverse   | TGCTCCTGGCAGGCACGGA       |
| Cyclin E                 | Forward   | GAGCCAGCCTTGGGACAATAA     |
|                          | Reverse   | GCACGTTGAGTTTGGGTAAACC    |
| CDK2                     | Forward   | TTTGCTGAGTGGTGA CTG CCG   |
|                          | Reverse   | CCGGCCCACTTGGGGAAAC       |
| CDK4                     | Forward   | CTTCCCGTCAGCACAGTTC       |
|                          | Reverse   | GGTCAGCATTTCAGTAGC        |
| p21 <sup>waf1/cip1</sup> | Forward   | GCGATGGA ACTTCGACTTTGT    |
|                          | Reverse   | GGGCTTCCTCTTGGAGAAGAT     |
| p27 <sup>kip1</sup>      | Forward   | ATGTCAAACGTGCGAGTGTC      |
|                          | Reverse   | TCTCTGCAGTGCTTCTCCA       |
| p-Rb                     | Forward   | ATCCGAGGCAACTACAGCCTA     |
|                          | Reverse   | CCTTTCCAACCGTGGGAATAAT    |
| Bcl-2                    | Forward   | CCTGTGGATGACTGAGTACC      |
|                          | Reverse   | GAGACAGCCAGGAGAAATCA      |
| Bax                      | Forward   | GTTTCATCCAGGATCGAGCAG     |
|                          | Reverse   | CATCTTCTTCCAGATGGTGA      |
| Cyt c                    | Forward   | TTTGGATCCAATGGGTGATGTTGAG |
|                          | Reverse   | CCATCCCTACGCATCCTTTAC     |

|           |         |                             |
|-----------|---------|-----------------------------|
| Fas L     | Forward | GGATTGGGCCTGGGGATGTTTCA     |
|           | Reverse | TTGTGGCTCAGGGGCAGGTTGTTG    |
| Caspase-8 | Forward | AGAGTCTGTGCCCAAATCAAC       |
|           | Reverse | GCTGCTTCTCTCTTTGCTGAA       |
| Caspase-9 | Forward | TGTCCTACTCTACTTTCCAGTTTT    |
|           | Reverse | GTGAGCCCACTGCTCAAAGAT       |
| GADPH     | Forward | GACCCCTTCATTGACCTCAACTACATG |
|           | Reverse | GTGCACCACCCTGTTGCTGTAGCC    |
